# Supplementary material for: A natural transdifferentiation event involving mitosis is empowered by integrating signaling inputs with conserved plasticity factors
Source: PubMed Central journal article supplement (PMC9513805; doi:10.1016/j.celrep.2022.111365), 2022-09-20
Supplement: mmc1.pdf [file mmc1.pdf]

Cell Reports, Volume 40

## Supplemental information

**A natural transdifferentiation event involving  
mitosis is empowered by integrating signaling  
inputs with conserved plasticity factors**

**Claudia Riva, Martina Hajduskova, Christelle Gally, Shashi Kumar Suman, Arnaud Ahier, and Sophie Jarriault**

Fig. S1.

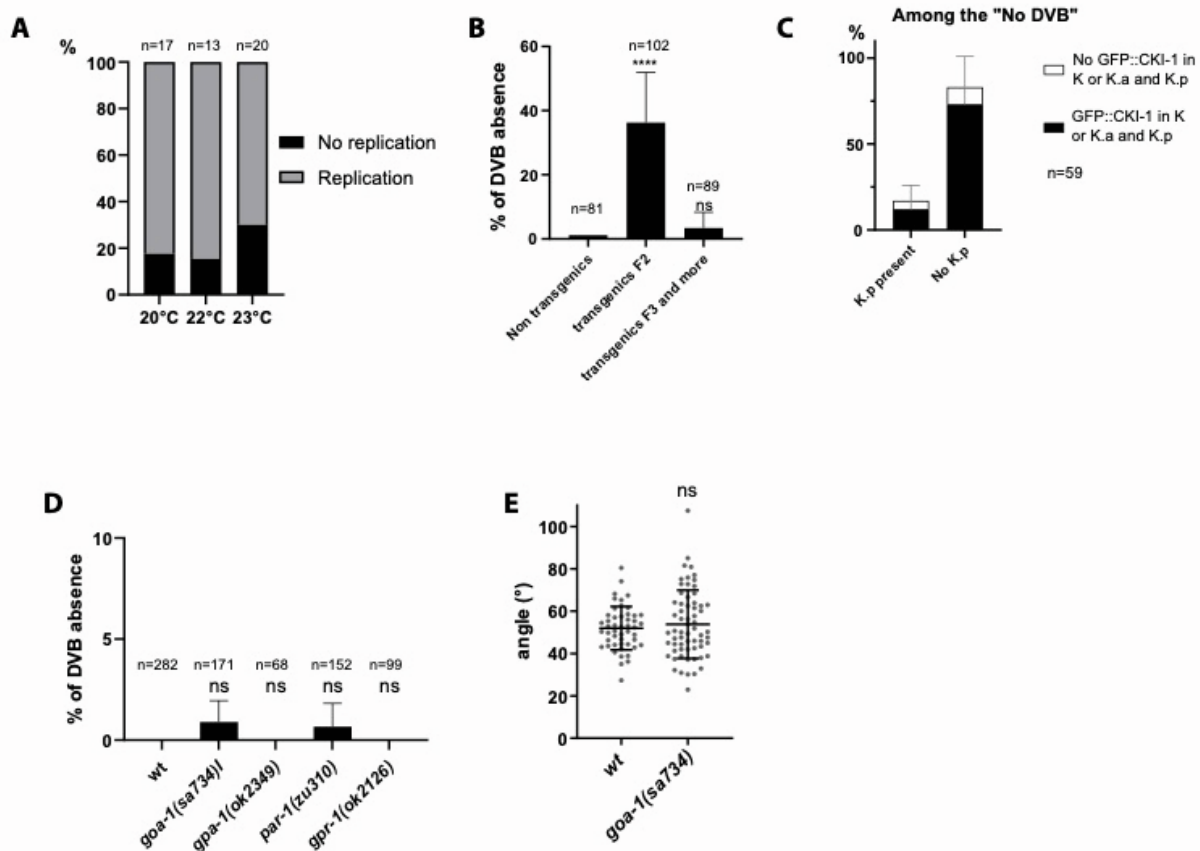

**Figure S1. While DNA replication in K is not sufficient for DVB formation and division orientation mutants do not impact K-to-DVB, K division is required for K-to-DVB. Related to Figure 2.**

(A) Histogram summarizing the percentage of animals in which K DNA underwent replication in the *lin-5(ev571ts)* mutant at different restrictive temperatures.

(B) Histogram showing the percentage of animals with a “NO DVB” defect, and without (Non transgenics) or with (transgenics) overexpression of *gfp::cki-1* in the rectal cells. Note that for the transgenics, the F2 generation of the transgenic lines was first scored and displayed more penetrant defects than the following generations, due to transgene silencing.

(C) Histogram showing the percentage animals displaying an absence (No K.p) or presence (K.p present) of the K.p cell among the *gfp::cki-1* overexpressing animals without DVB. Note that for each category, the GFP expression was assessed in K, K.a and K.p, when present. Solid bar: GFP expression was observed; white bar, No GFP expression. Error bars, SD of the GFP-expressing animals.

(D) Histogram showing the percentage of worms without DVB in mutants for the *Ga* and *gpr-1/LGN* genes involved in spindle orientation in *C. elegans* zygote and for the Par gene *par-1*. The low penetrance of DVB absence is due to an impairment in K cytokinesis.

(E) Dot plot representing K division angle in the *goa-1(sa734)* mutant. n=64.

For all the histograms, ns, not significant; n, total animal scored.

Fig. S2.

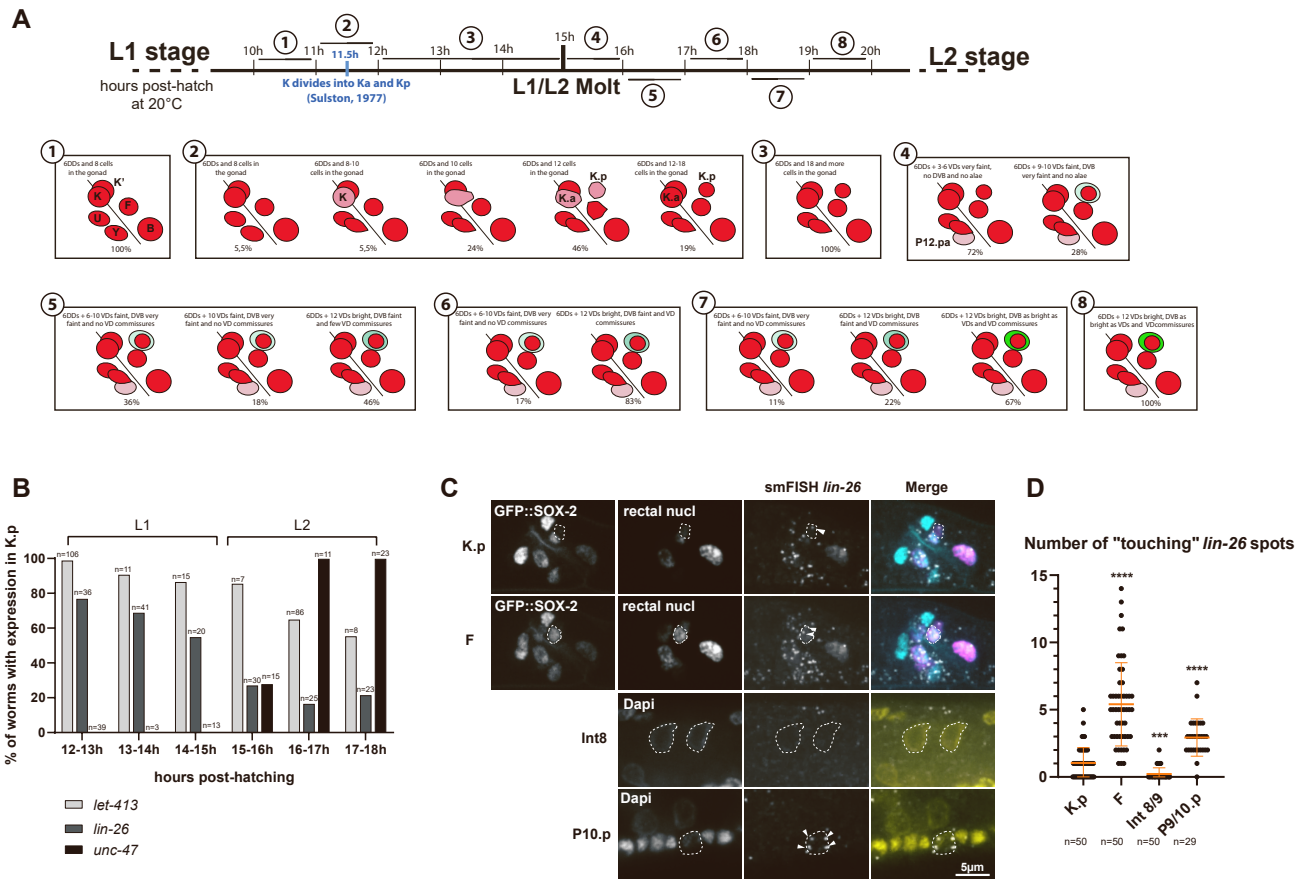

**Figure S2. K divides into K.a and K.p in late L1 stage and K.p still shows epithelial features after division. Related to Figure 2.**

**(A)** Time course of the cellular events during K division and DVB formation along the developmental timeline. The *col-34p::mCherry* positive rectal cells and the rectal slit (line) are represented. Each box corresponds to a point of one hour where different characteristic landmarks have been observed in addition to K division: number of GABAergic neurons, VD commissures, presence of alae, number of cells in the gonad, *col-34p::mCherry* and *unc-47p::GFP* intensities, rectal cell shapes. The percentage of animals (n%) with the corresponding landmarks is indicated at each particular time point. Worms were synchronized by hatch pulse (see Methods). Left is towards front, anterior is left, and dorsal is up.

**(B)** Quantification of worms with expression of *fpEx1062[let-413::gfp::pest]*, *fpIs110[lin-26p::GFP]* and *oxIs12[unc-47p::GFP]* in K.p over time, in L1 and L2 grown at 20°C. n, total animal scored.

**(C)** *lin-26* smFISH staining (white spots on the merge) on 26h post hatching L1 larvae expressing a *gfp::sox-2* (CRISPR KI *syb737*, shown in cyan) and the rectal nuclear reporter *gals245*, shown in magenta. Intestinal cells and Pn.p cells in the same area were identified with the DAPI staining, in yellow. Scale bar for all in bottom right picture.

**(D)** Quantifications of the *lin-26* smFISH spots were performed on K.p and F rectal cells as well as on intestinal cells (Int 8/9) and Pn.p cells (P9/10.p). We considered only the spots in contact with the nuclei to reflect the most recently transcribed mRNAs. Statistical test compares the number of spots in the K.p cell to the others. Very few *lin-26* mRNA molecules are detected in close proximity to the nucleus in epithelial cells generally (from 3 spots to 5 spots on average; P9/10.p where *lin-26* has been shown to be expressed (Labouesse et al., 1996), 3 spots; rectal F cell, 5 spots; K.a, which is on the left side, was very difficult to image because of photobleaching (n=9) and exhibits 4 spots on average). Intestinal cells, where *lin-26* is not expressed, show no *lin-26* mRNA spots (0, 22 spots on average).

Fig. S3.

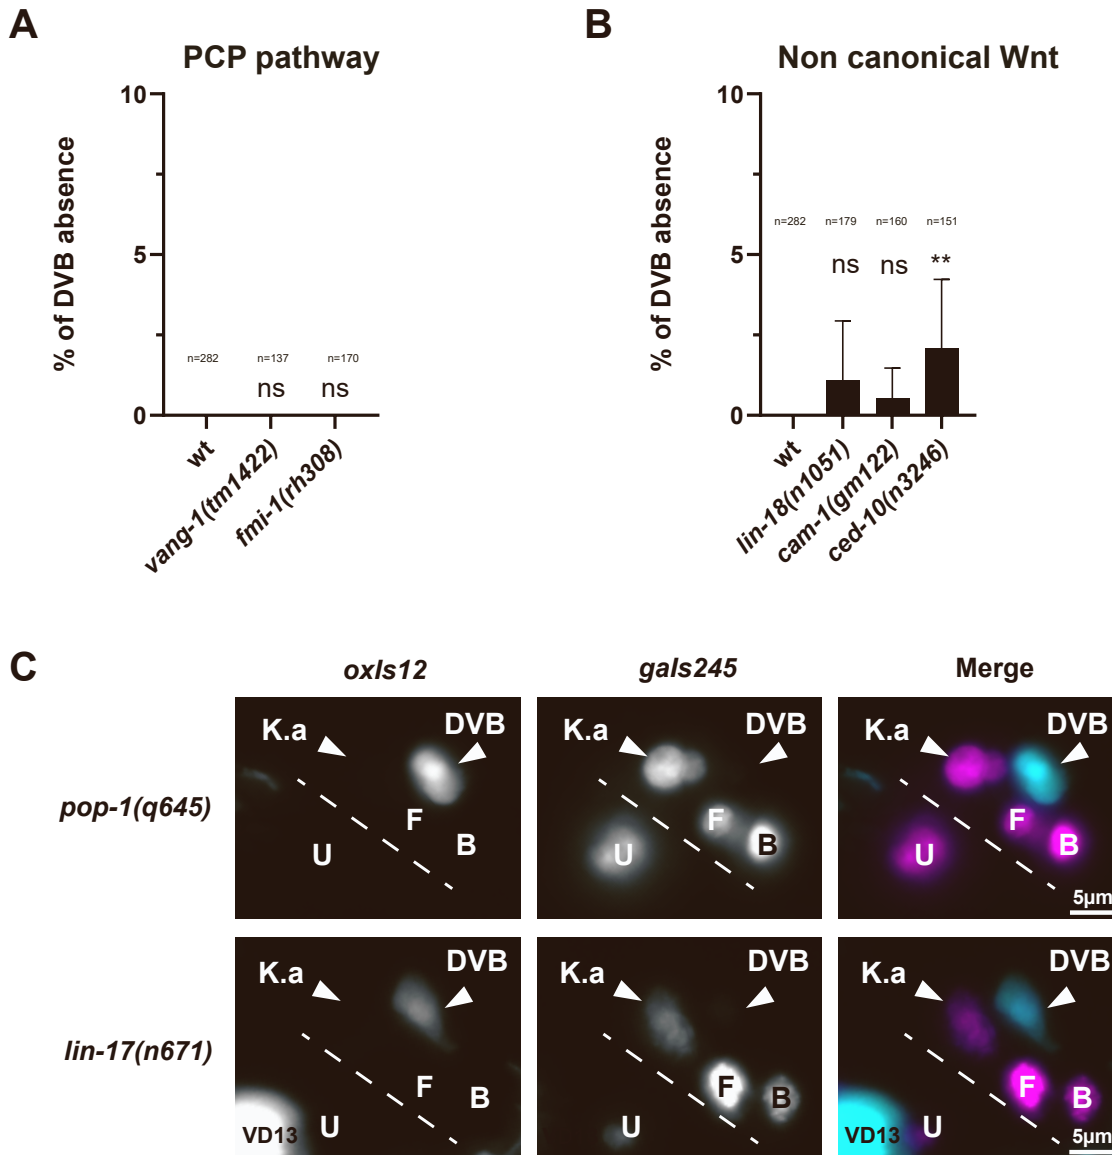

**Figure S3. The non-canonical Wnt pathways are not required for K-to-DVB. Related to Figure 3.**

(A) Histograms showing the percentage of “No DVB” worms in mutant backgrounds for genes of the PCP pathway.

(B) Histograms showing the percentage of “No DVB” worms in mutant backgrounds for the non-canonical Wnt-dependent pathways (*lin-18* and *cam-1*) or their downstream effectors (*ced-10*). n, total animal scored; ns, non-statistically significant; \*\*,  $p < 0.005$ .

(C) When present, in a small percentage of *pop-1/TCF* (top) or *lin-17/FZD* (bottom) L4 mutants, the DVB neuron is formed from K posterior daughter. The positions of DVB, as observed with *oxIs12*, and of the K.a, U, F and B rectal cells, as observed using *gals245*, are indicated. VD13, GABAergic neuron. Dash line, rectal slit. Anterior is to the left and ventral to the bottom.



Fig. S4.

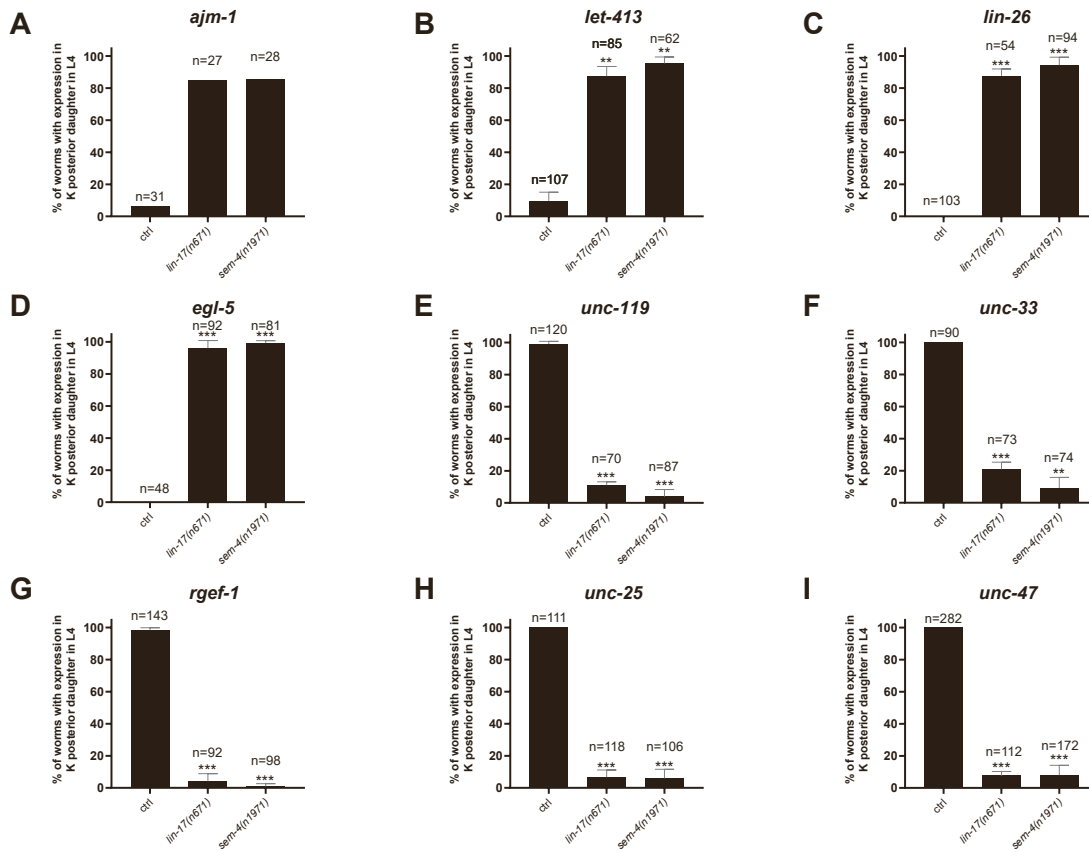

Figure S4. K.p cell remains rectal-epithelial in *lin-17/FZD* and *sem-4/SALL* mutants. Related to Figure 3 and Figure 4.

Quantification of the % of animals expressing (A-C) epithelial (*ajm-1*, *let-413* and *lin-26*), (D) rectal (*egl-5*), (E-G) pan-neuronal (*unc-119*, *unc-33* and *rgef-1*) and (H, I) GABAergic (*unc-25*, *unc-47*) reporters in K posterior daughter in *lin-17/FZD* and *sem-4/SALL* mutant backgrounds, or DVB in wild type, in L4 larvae. n, total animal scored.

Fig. S5.

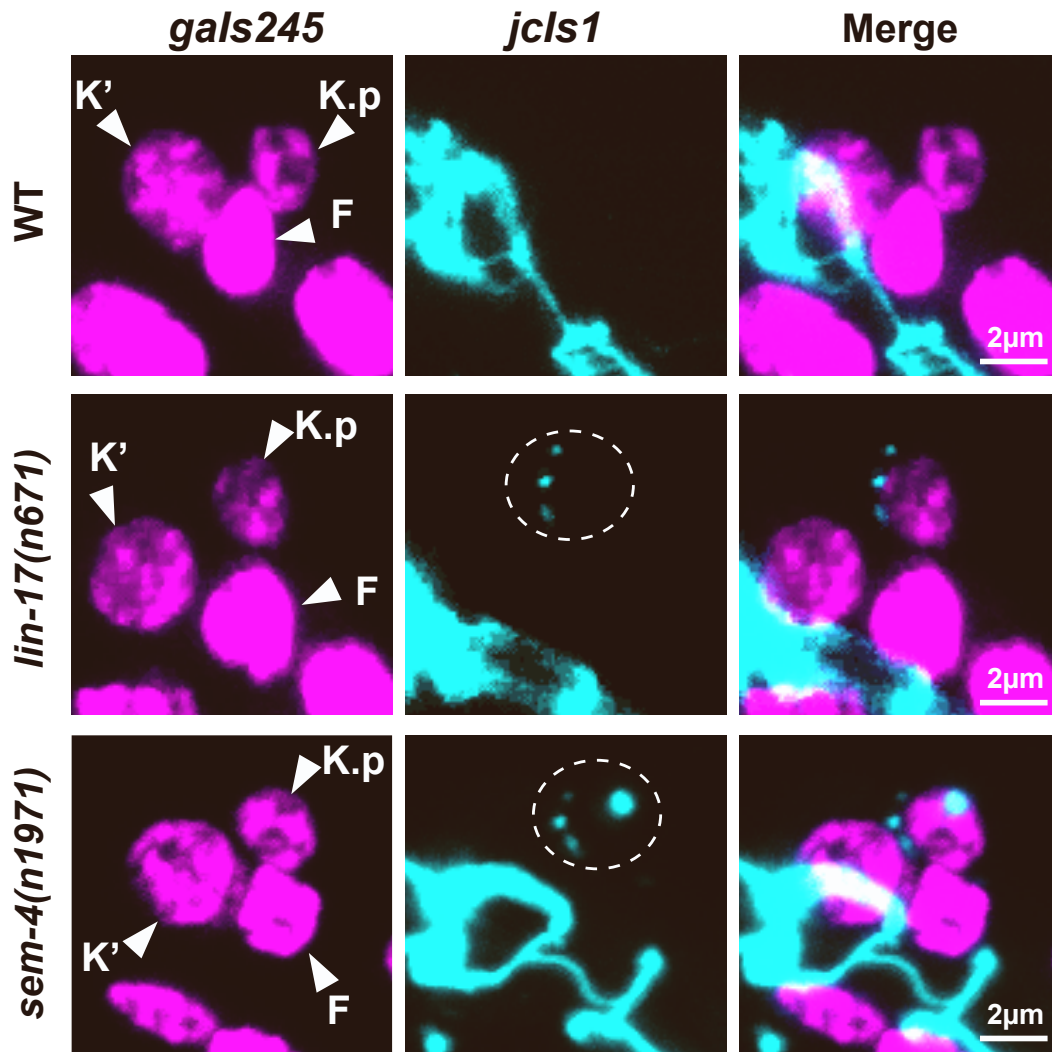

**Figure S5. K.p cell expresses the apical junction protein AJM-1 in *lin-17/FZD* and *sem-4/SALL* mutants. Related to Figure 3 and Figure 4.**

Confocal images of wild-type, *lin-17/FZD* and *sem-4/SALL* mutant backgrounds in L3 larvae carrying *gals245[col-34p::his-24::mcherry]* to visualize the rectal cell nuclei and *jcls1[ajm-1::GFP]*. Patches of AJM-1 proteins are present in the K.p cell (dashed oval) in the mutant backgrounds, consistently with the mutant K.p retaining its epithelial identity.

Fig. S6.

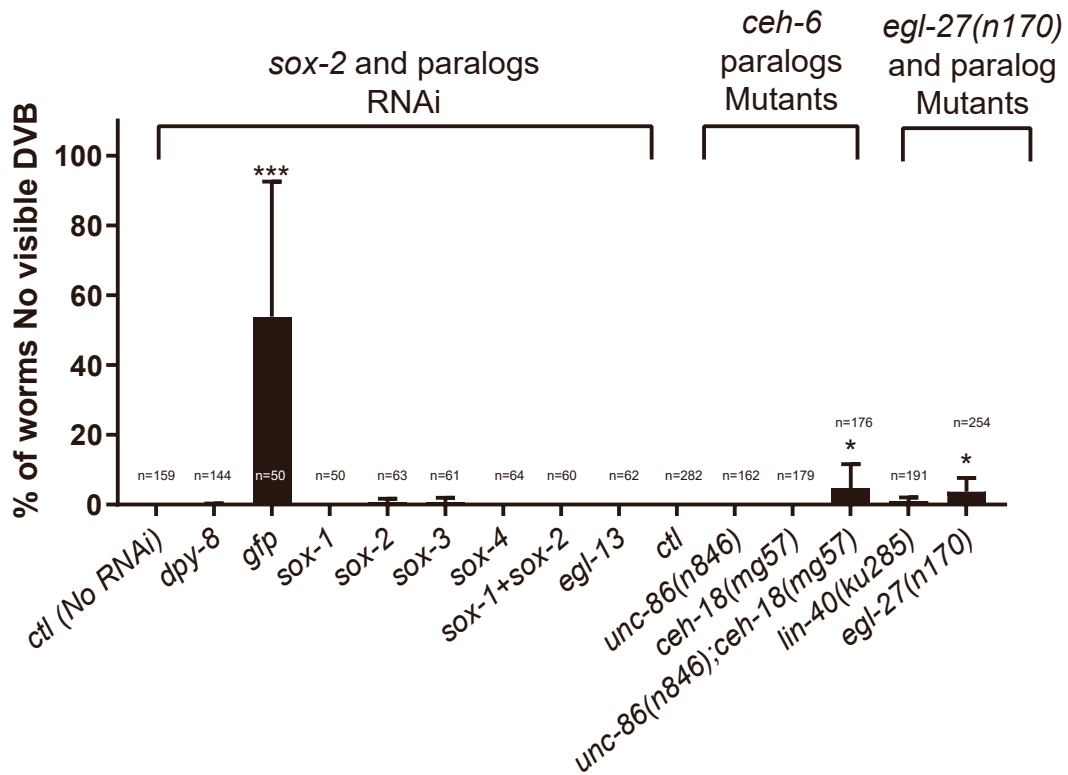

Figure S6. *sox-2*, *ceh-6* and *egl-27* paralogs do not seem to be required to form DVB. Related to Figure 4.

Quantification of DVB defective L4 animals (as observed by *unc-47* expression) using RNAi in a sensitized *rrf-3* mutant background to target *sox-2* paralogs (*dpy-8* and *gfp* RNAi represent controls). Mutants were used for paralogs of *ceh-6* (*unc-86(n846)* and *ceh-18(mg57)*) and *egl-27* (*lin-40(ku285)*). No obvious defects were observed, although RNAi was found to work poorly in the rectal cells. n, total animal scored.

Fig. S7.

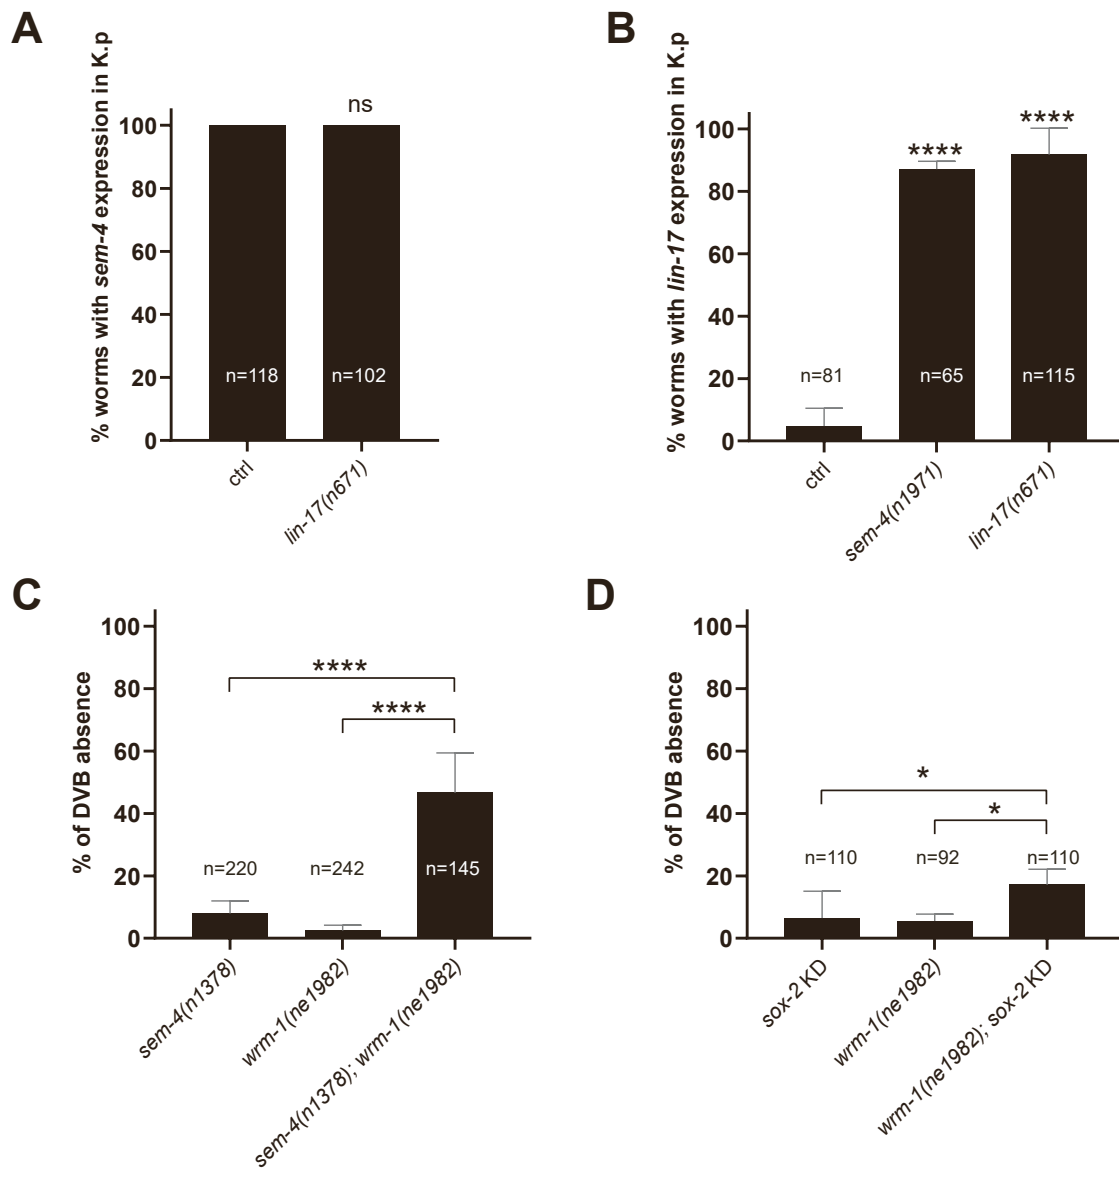

**Figure S7. *sem-4/SALL* and the Wnt signaling pathway act in parallel to drive K-to-DVB Td. Related to Figure 5.**

(A) Quantification of *sem-4/SALL* expression in K.p in wild type L4s and in *lin-17/Frizzled* mutant L4s.  
 (B) Quantification of *lin-17/FZD* expression in K.p in wild type L4s vs *sem-4/SALL* and *lin-17/FZD* mutants.  
 (C-D) Quantification of DVB defective L4 animals (as observed by *unc-47* expression using *krIs6* in A and *oxIs12* in B) in simple *sem-4(n1378)* (C), *sox-2* knock-down (using a nanobody strategy, D) and *wrm-1(n1982)* (C, D) mutants, or in *sem-4(n1378);wrm-1(n1982)* (C) and *wrm-1(n1982);sox-2* KD (D) double mutants, all raised at 25°C. n, total animal scored.

Fig. S8.

**A**

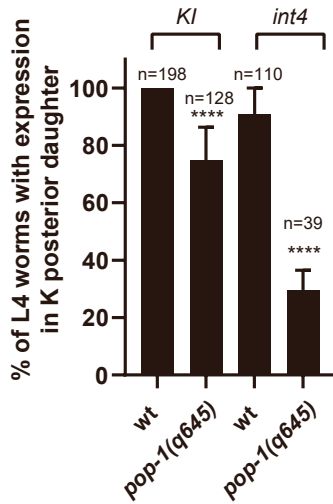

**B**

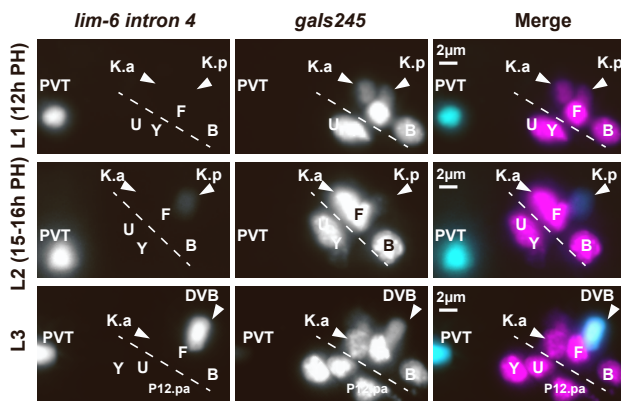

**C**

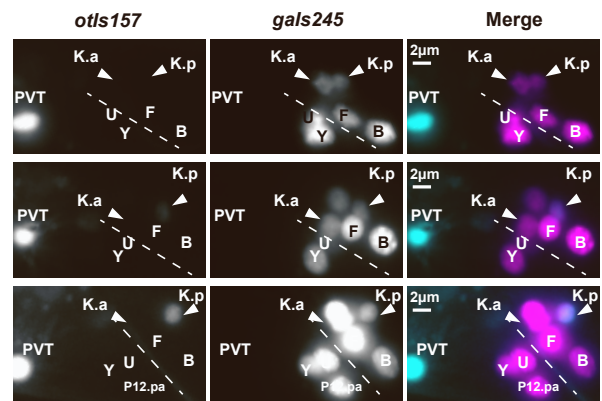

**Figure S8. *lim-6* is expressed early in K.p and its expression is affected in *pop-1/TCF* mutant. Related to Figure 5.**

(A) *lim-6* expression is impaired in *pop-1* mutant. Quantification of the % of L4 larvae expressing *lim-6::gfp* CRISPR (KI) and *lim-6 intron 4* transcriptional reporter (*int4*) in wild-type (DVB) and *pop-1(q645)* mutant (persistent K.p) backgrounds. Note that for the *pop-1(q645)* mutant, only viable homozygote (not balanced) mutant worms were analyzed. n, total animal scored.

(B-C) Time course expression of *lim-6(int4)::gfp* (*fpEx1111*) (B) and *lim-6r::gfp* (*otIs157*) (C) reporters in K.p/DVB (Cyan) in L1, 1h after the division (top), in an early L2 animal (middle) and in an L3 larva (bottom) where rectal cells are visualized with *gals245* (*col-34p::his-24::mcherry*; magenta).

For all pictures, dashed line, rectal slit. Anterior is to the left and ventral to the bottom.



Fig. S10.

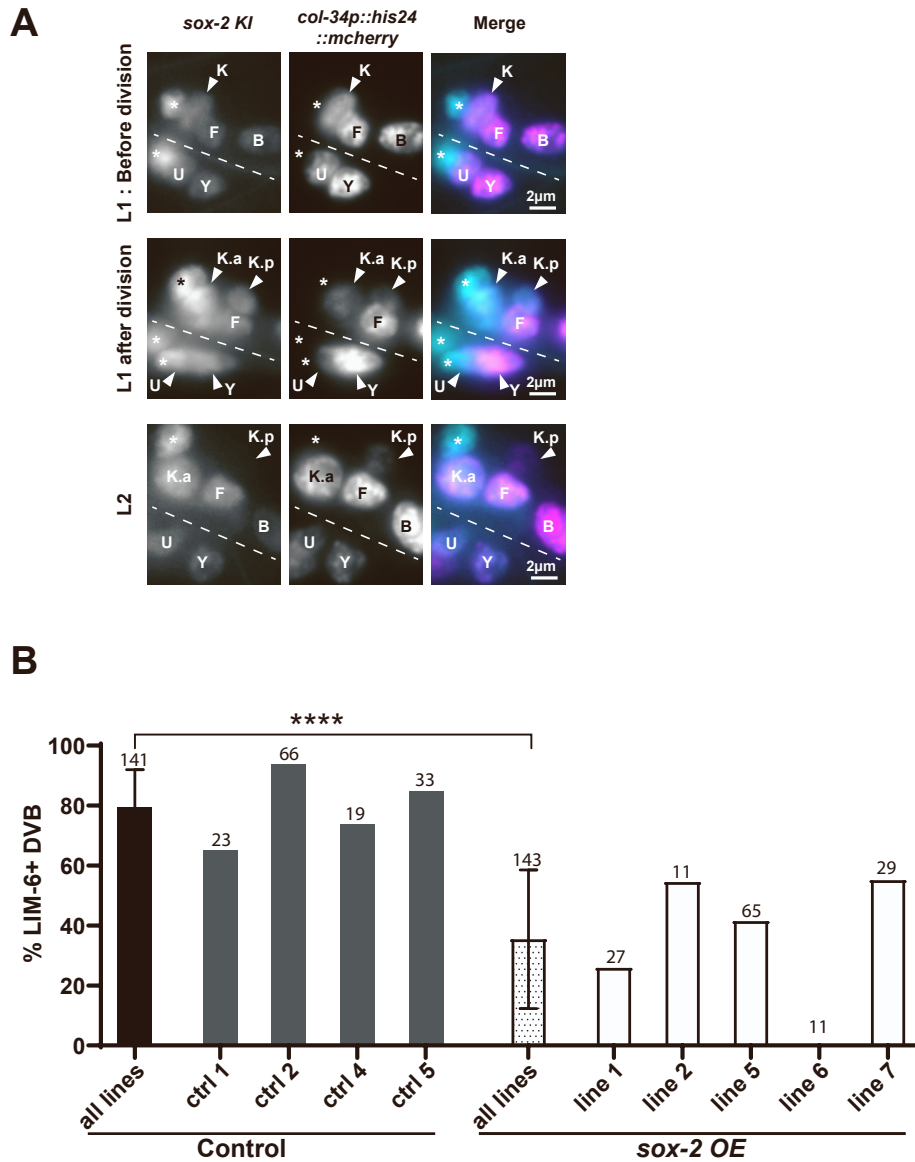

**Figure S10. *sox-2* is expressed in K.p after K division and it is subsequently downregulated during DVB differentiation. Overexpression of *sox-2* prevents *lim-6* expression. Related to Figure 5A.**

(A) Fluorescent images of *gfp::sox-2* KI and *col-34p::his-24::mcherry* in the rectum of a wild-type L1 animal before K division (top), in an L1 animal after K division (14 cells in the gonad; middle) and in an L2 animal (bottom). Note that K.a continues to express *sox-2* over time whereas expression fades away in K.p during its conversion. White stars indicate the rectal gland cells; the rectal cell position is indicated on the pictures; dashed line, rectal slit; anterior is left and ventral is bottom.

(B) The rectal *col-34* promoter was used to overexpress (OE) SOX-2 in K.p along with a co-injected *lim-6(int4)::mCherry* reporter. The % of L4 animals displaying *lim-6* expression in DVB are represented. Black bar, all results obtained for the control lines (*lim-6(int4)::mCherry* alone) and dark grey bars, each individual line data respectively; Dotted bar, all results obtained for the SOX-2 overexpressing lines, followed by each individual SOX-2(OE) line data (white bars). Note that transgenic lines overexpressing SOX-2 are difficult to retrieve and maintain, and throw few transgenic animals: transgenics in the F2 generation were usually the only animals that could be scored. The total number of animals scored is indicated above each bar. \*\*\*\*,  $p < 0.0001$ .

Fig. S11.

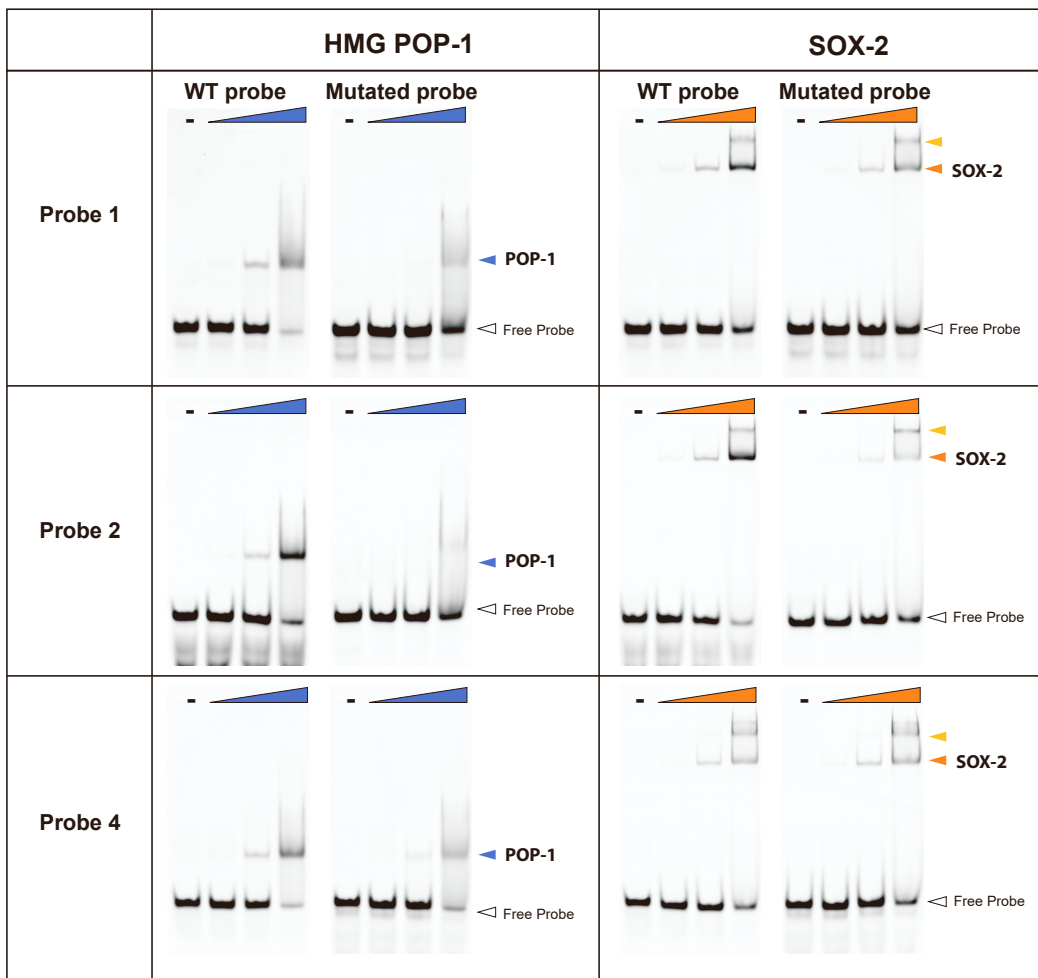

**Figure S11. Gel shift experiments show independent binding capacities of POP-1 and SOX-2 to probes 1, 2 and 4. Related to Figure 5E, F.**

Increasing concentration (5nM, 50nM and 500nM) of purified HMG-POP-1 and SOX-2 were incubated with wild type or mutated probes 1, 2 and 4 bound to the Cy5 fluorophore. Note that the probe 4 which does not bear canonical SOX-2 binding site is able to bind SOX-2. As, in addition, the mutation of the POP-1 binding site does not seem to affect this binding, it is likely that a non-predicted SOX-2 binding site is present. Probe 3 was also able to bind both SOX-2 and HMG-POP-1, although results for are not presented because this probe annealed poorly, most probably due to its AT-rich sequence. Blue arrowhead, POP-1 bound to the probe; orange arrowhead, SOX-2 bound to the probe; light orange arrowhead, a second SOX-2 shifted band appears at high SOX-2 concentrations; open arrowhead, unbound probe.



Fig. S12.

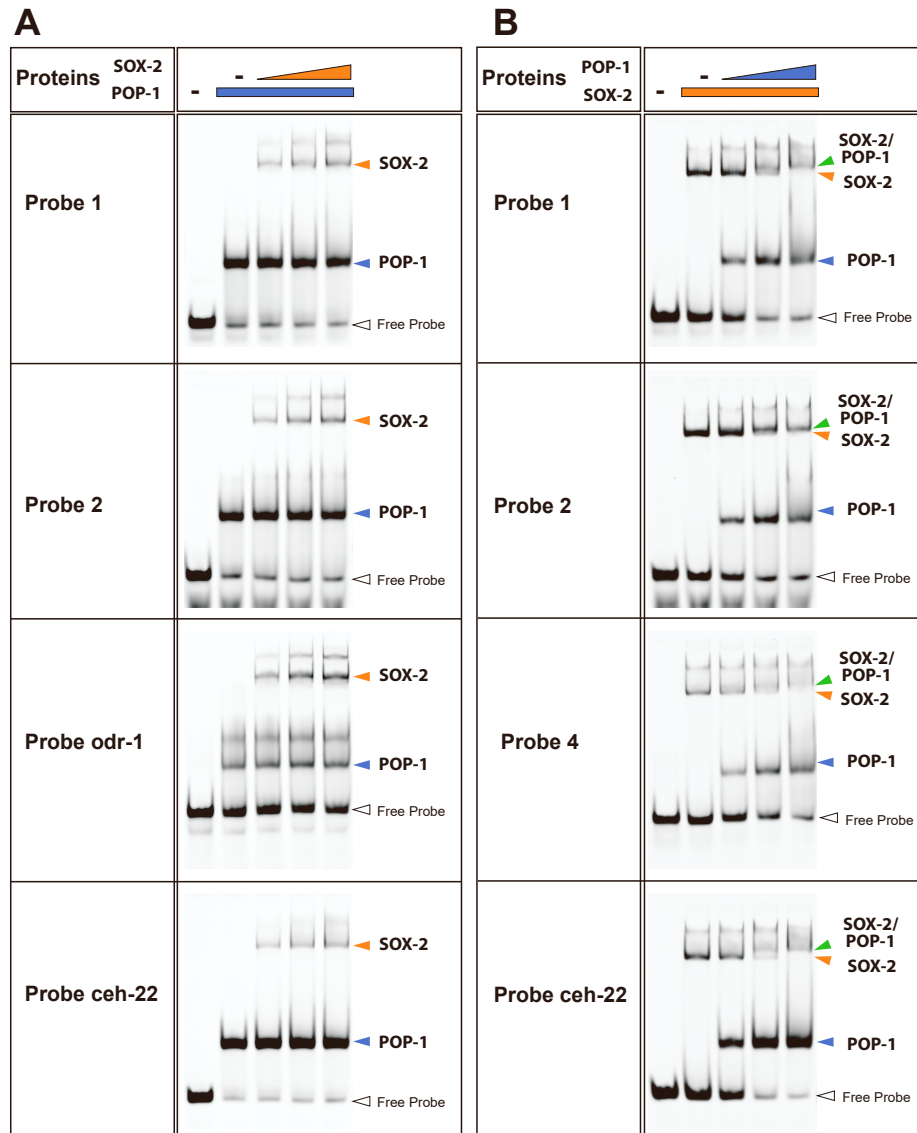

**Figure S12. Gel shift experiments show binding capacities of POP-1 and SOX-2 when co-incubated. Related to Figure 5E, F.**

(A) Increasing quantity of SOX-2 (125nM-250nM-500nM) was added to a mix of HMG-POP-1 and Cy-5-dsProbe #1, #2, *odr-1* (known SOX-2 target, Alqadah, 2015) and *ceh-22* (known POP-1 target, Lam, 2007, Bhambhani, 2014).

(B) Increasing quantity of HMG-POP-1 (125nM-250nM-500nM) was added to a mix of SOX-2 and Cy-5-dsProbe #1, #2, #4 and *ceh-22*. Increasing quantity of HMG-POP-1 shows an increasing binding to all the probes as well as an upper shift, most probably corresponding to a HMG-POP-1-SOX-2-Probe complex.

Blue arrowhead, POP-1 bound to the probe; orange arrowhead, SOX-2 bound; green arrowhead, POP-1 and SOX-2 bound; open arrowhead, unbound probe.

**Fig. S13.**

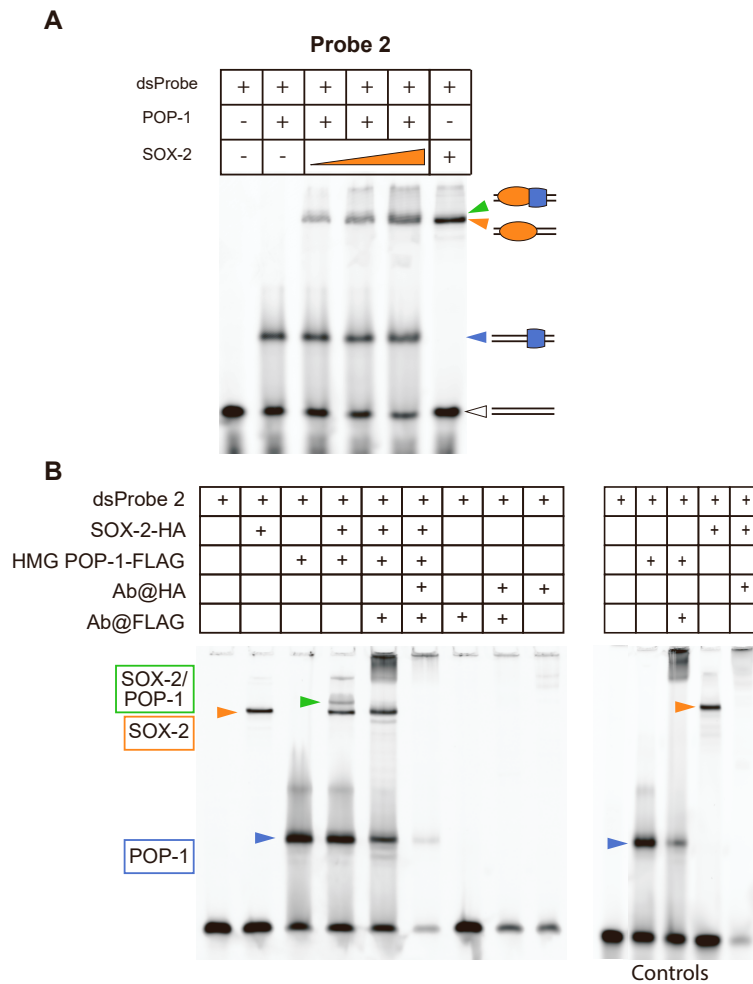

**Figure S13. Antibody supershift EMSA analysis of SOX-2 and POP-1 co-binding. Related to Figure 5E, F.**

(A) Representative EMSA assay on Probe 2 revealing single binding of SOX-2 (orange arrow head) and HMG-POP-1 (blue arrow head) as well as co-binding (upper band, green arrow head).

(B) This upper band was totally upshifted after pre-incubation of the complex with an anti-FLAG antibody (Ab@FLAG) against HMG-POP-1-FLAG.

Various combinations of antibodies/protein/probe complexes were used for controls as indicated.

**Table S1. Summary of all cell markers expression.**

| C. elegans genes                                                           | Human ortholog                   | Reporter                                                                      | WT |          |     |     | <i>sem-4</i>     | <i>lin-17</i>    | References reporter                              | Ref observation                     |
|----------------------------------------------------------------------------|----------------------------------|-------------------------------------------------------------------------------|----|----------|-----|-----|------------------|------------------|--------------------------------------------------|-------------------------------------|
|                                                                            |                                  |                                                                               | L1 | early L2 |     | L4  | L4               | L4               |                                                  |                                     |
|                                                                            |                                  |                                                                               | K  | K.a      | K.p | DVB | K post. daughter | K post. daughter |                                                  |                                     |
| <b>Epithelial markers</b>                                                  |                                  |                                                                               |    |          |     |     |                  |                  |                                                  |                                     |
| <i>dlg-1</i>                                                               | <i>DLG</i>                       | <i>mcls46[dlg-1::rfp]</i>                                                     | +  | +        | -   | -   | N.D              | N.D              | Diogon et al. (2007)                             | This study                          |
| <i>ajm-1</i>                                                               | <i>AJM1</i>                      | <i>jcls1[ajm-1::gfp]</i>                                                      | +  | +        | -   | -   | +                | +                | Mohler et al. (1998)                             | This study; Mohler et al. (1998)    |
| <i>hmr-1</i>                                                               | Cadherin                         | <i>fpls17[hmr-1::gfp]</i>                                                     | +  | +        | -   | -   | N.D              | N.D              | This study                                       | This study                          |
| <i>let-413</i>                                                             | <i>SCRIB</i>                     | <i>fpEx1062[let-413a::gfp::pest]</i>                                          | +  | +        | +   | -   | +                | +                | This study                                       | This study                          |
| <i>lin-26</i>                                                              | Zinc-finger transcription factor | <i>fpls110[lin-26rectalp::gfp]</i>                                            | +  | +        | +   | -   | +                | +                | Labouesse et al. (1996); this study              | Labouesse et al. (1996); this study |
| <b>Rectal markers (also in other cells, to visualise the rectal cells)</b> |                                  |                                                                               |    |          |     |     |                  |                  |                                                  |                                     |
| <i>sem-4</i>                                                               | <i>SALL</i> transcription factor | <i>syb1287[sem-4::gfp]</i>                                                    | +  | +        | +   | +   | ND               | +                | This study                                       | This study                          |
| <i>sox-2</i>                                                               | <i>SOX</i> transcription factor  | <i>syb737[gfp::sox-2]</i>                                                     | +  | +        | +*  | -   | +                | +                | This study                                       | This study                          |
| <i>ceh-6</i>                                                               | <i>POU</i> transcription factor  | <i>syb972[gfp::ceh-6]</i>                                                     | +  | +        | +*  | -   | +                | +                | This study                                       | This study                          |
| <i>egl-5</i>                                                               | <i>HOX</i> transcription factor  | <i>bxls7[egl-5::gfp]</i>                                                      | +  | +        | +   | -   | ND               | ND               | Teng et al. (2004)                               | This study                          |
| <i>col-34</i>                                                              | Cuticle collagen gene            | <i>gals245[col-34p::his-24::mcherry]</i>                                      | +  | +        | +   | -   | +                | +                | Zuryn et al. (2014)                              | This study                          |
| <i>got-1.2</i>                                                             | <i>GOT1</i>                      | <i>sts11174[rCesT01C8.5::gfp+pCeh361]</i>                                     | +  | +        | +   | -   | ND               | ND               | McKay et al. (2003)                              | This study                          |
| <b>Pan-neuronal markers</b>                                                |                                  |                                                                               |    |          |     |     |                  |                  |                                                  |                                     |
| <i>unc-33</i>                                                              | <i>DPYS</i>                      | <i>ots117[unc-4(+); unc-33p::GFP]</i><br><i>ots118[unc-33::GFP; unc-4(+)]</i> | -  | -        | -   | +   | -                | -                | McKay et al. (2003)                              | This study                          |
| <i>unc-119</i>                                                             | <i>UNC119</i>                    | <i>edis6[unc-119::gfp; rol-6]</i>                                             | -  | -        | -   | +   | -                | -                | Maduro and Pilgrim (1995); Praitis et al. (2001) | This study                          |
| <i>rgef-1</i>                                                              | <i>RASGRP3</i>                   | <i>ots173 [F25B3.3::DsRed2; ttx-3promB::GFP]</i>                              | -  | -        | -   | +   | -                | -                | Benard et al. (2009)                             | This study                          |
| <b>DVB Terminal selector</b>                                               |                                  |                                                                               |    |          |     |     |                  |                  |                                                  |                                     |
| <i>lim-6</i>                                                               | <i>LMX1B</i>                     | <i>syb971[lim-6::gfp]</i><br><i>ots157[lim-6r::GFP]</i>                       | -  | -        | +   | +   | -                | -                | This study                                       | Hobert et al. (1999); this study    |
| <b>GABAergic markers</b>                                                   |                                  |                                                                               |    |          |     |     |                  |                  |                                                  |                                     |
| <i>unc-47</i>                                                              | <i>SLC32A1</i>                   | <i>oxls12[unc-47p::gfp]</i><br><i>krls6[unc-47p::DsRed2]</i>                  | -  | -        | -   | +   | -                | -                | McIntire et al. (1997)                           | McIntire et al. (1997); this study  |
| <i>unc-25</i>                                                              | <i>GAD</i>                       | <i>juls8[unc-25p::gfp]</i>                                                    | -  | -        | -   | +   | -                | -                | Jin et al. (1999)                                | Jin et al. (1999) ; this study      |

\* , expression is seen in K.p after its birth, and disappears as *lim-6* expression appears (see Fig. 5A).

**Table S2. Strain list.**

| <b>C. elegans strain</b>                                                                                                                                             | <b>Identifier</b> |
|----------------------------------------------------------------------------------------------------------------------------------------------------------------------|-------------------|
| <i>rrf-3(pk1426) II ; oxIs12[unc-47::gfp; lin-15(+)] X</i>                                                                                                           | <b>IS17</b>       |
| <i>lin-5(ev571) II; gaIs245[col-34p::his-24::mcherry; unc-119(+)] V ; oxIs12[unc-47p::gfp; lin-15(+)] X</i>                                                          | <b>IS1118</b>     |
| <i>sem-4(n1971) bxIs7[egl-5p(6,5kb)::gfp; lin-15(+)] I; otIs173[rgef-1p::dsred2; ttx-3p::gfp] III</i>                                                                | <b>IS1208</b>     |
| <i>sem-4(n197) I; otIs117[unc-4(+); unc-33p::gfp] IV; gaIs245[col-34p::his-24::mcherry; unc-119(+)] V</i>                                                            | <b>IS1210</b>     |
| <i>gaIs245[col-34p::his-24::mcherry; unc-119(+)] V; oxIs12[unc-47p::gfp; lin-15(+)] X</i>                                                                            | <b>IS1299</b>     |
| <i>egl-5(n945) III; gaIs245[col-34p::his-24::mcherry; unc-119(+)] V; oxIs12[unc-47p::gfp; lin-15(+)] X</i>                                                           | <b>IS1332</b>     |
| <i>lin-17(n671) I; gaIs245[col-34p::his-24::mcherry; unc-119(+)] V; oxIs12[unc-47p::gfp; lin-15(+)] X</i>                                                            | <b>IS1370</b>     |
| <i>fpIs17[hmr-1::gfp]; gaIs245[col-34p::his-24::mcherry; unc-119(+)] V</i>                                                                                           | <b>IS1374</b>     |
| <i>wrm-1(ne1982) III; gaIs245[col-34p::his-24::mcherry; unc-119(+)] V; oxIs12[unc-47p::gfp; lin-15(+)] X</i>                                                         | <b>IS1432</b>     |
| <i>sem-4(n1971) I; gaIs245[col-34p::his-24::mcherry; unc-119(+)] V; oxIs12[unc-47p::gfp; lin-15(+)] X</i>                                                            | <b>IS2968</b>     |
| <i>unc-86(n846) III; gaIs245[col-34p::his-24::mcherry; unc-119(+)] V; oxIs12[unc-47p::gfp; lin-15(+)] X</i>                                                          | <b>IS3097</b>     |
| <i>fpIs110[lin-26p::gfp; rol-6(su1006)] IV; gaIs245[col-34p::his-24::mcherry; unc-119(+)] V</i>                                                                      | <b>IS3107</b>     |
| <i>egl-27(ok1670) II; gaIs245[col-34p::his-24::mcherry; unc-119(+)] V; oxIs12[unc-47p::gfp; lin-15(+)] X</i>                                                         | <b>IS3113</b>     |
| <i>gaIs245[col-34p::his-24::mcherry; unc-119(+)] V; fpEx1062[let-413a::gfp::pest; myo-2p::gfp]</i>                                                                   | <b>IS3119</b>     |
| <i>gaIs245[col-34p::his-24::mcherry; unc-119(+)] V; oxIs12[unc-47p::gfp; lin-15(+)] X; fpEx955[Δ(-2846pb to -102)ceh-6p::gfp::ceh-6; odr-1::rfp]</i>                 | <b>IS3120</b>     |
| <i>ceh-6(gk665) I; gaIs245[col-34p::his-24::mcherry; unc-119(+)] V; oxIs12[unc-47p::gfp; lin-15(+)] X; fpEx955[Δ(-2846pb to -102)ceh-6p::gfp::ceh-6; odr-1::rfp]</i> | <b>IS3122</b>     |
| <i>gaIs245[col-34p::his-24::mcherry; unc-119(+)] V; oxIs12[unc-47p::gfp; lin-15(+)] X; fpEx788[egl-5p(1,3kb)::sox-2(antisens); rol-6(su1006)]</i>                    | <b>IS3142</b>     |
| <i>lin-40(ku285) V; oxIs12[unc-47p::gfp; lin-15(+)] X</i>                                                                                                            | <b>IS3146</b>     |
| <i>sem-4(n1971) I; gaIs245[col-34p::his-24::mcherry; unc-119(+)] V; fpEx1062[let-413a::gfp::pest; myo-2p::gfp]</i>                                                   | <b>IS3176</b>     |
| <i>gaIs245[col-34p::his-24::mcherry; unc-119(+)] V; juIs8[unc-25p::gfp; lin-15(+)]</i>                                                                               | <b>IS3298</b>     |
| <i>edIs6[unc-119p::gfp; rol-6(su1006)] IV; gaIs245[col-34p::his-24::mcherry; unc-119(+)] V</i>                                                                       | <b>IS3327</b>     |
| <i>lin-17(n671)I; edIs6[unc-119p::gfp; rol-6(su1006)] IV; gaIs245[col-34p::his-24::mcherry; unc-119(+)] V</i>                                                        | <b>IS3328</b>     |

|                                                                                                                                                                                                                 |               |
|-----------------------------------------------------------------------------------------------------------------------------------------------------------------------------------------------------------------|---------------|
| <i>gals245[col-34p::his-24::mcherry; unc-119(+)] V; otIs118[unc-33p::gfp; unc-4(+)]</i>                                                                                                                         | <b>IS3329</b> |
| <i>lin-17(n671)I; gals245[col-34p::his-24::mcherry; unc-119(+)] V; otIs118[unc-33p::gfp; unc-4(+)]</i>                                                                                                          | <b>IS3330</b> |
| <i>lin-17(n671)I; gals245[col-34p::his-24::mcherry; unc-119(+)] V; juIs8 [unc-25p::gfp; lin-15(+)]</i>                                                                                                          | <b>IS3335</b> |
| <i>jcIs1[ajm-1::gfp; rol-6(su1006)] IV; gals245[col-34p::his-24::mcherry; unc-119(+)] V</i>                                                                                                                     | <b>IS3339</b> |
| <i>lin-17(n671) I; fpIs110[lin-26p::gfp; rol-6(su1006)] IV; gals245[col-34p::his-24::mcherry; unc-119(+)] V</i>                                                                                                 | <b>IS3349</b> |
| <i>lin-17(n671) I; jcIs1[ajm-1::gfp; rol-6(su1006)] IV; gals245[col-34p::his-24::mcherry; unc-119(+)] V</i>                                                                                                     | <b>IS3357</b> |
| <i>gals245[col-34p::his-24::mcherry; unc-119(+)] V; fpEx1111[lim-6int4::gfp; coel::dsred]</i>                                                                                                                   | <b>IS3379</b> |
| <i>lin-17(n671) I; gals245[col-34p::his-24::mcherry; unc-119(+)] V; fpEx1062[let-413a::gfp::pest; myo-2p::gfp]</i>                                                                                              | <b>IS3383</b> |
| <i>lin-17(n671) I; gals245[col-34p::his-24::mcherry; unc-119(+)] V; fpEx1111[lim-6int4::gfp; coel::dsred]</i>                                                                                                   | <b>IS3420</b> |
| <i>gals245[col-34p::his-24::mcherry; unc-119(+)] V; sox-2(syb737[gfp::linker::sox-2]) X</i>                                                                                                                     | <b>IS3423</b> |
| <i>wyIs75[unc-47p::dsred; exp-1p::gfp; odr-1p::rfp] III; vang-1(tm1422)X</i>                                                                                                                                    | <b>IS3433</b> |
| <i>unc-73(e936) dpy-5(e61) I ; gals245[col-34p::his-24::mcherry; unc-119(+)] V ; oxIs12[unc-47p::gfp; lin-15(+)] X</i>                                                                                          | <b>IS3452</b> |
| <i>lin-17(n671) I; gals245[col-34p::his-24::mcherry; unc-119(+)] V; sox-2(syb737[gfp::linker::sox-2]) X</i>                                                                                                     | <b>IS3457</b> |
| <i>sem-4(n1971) I; gals245[col-34p::his-24::mcherry; unc-119(+)] V; sox-2(syb737[gfp::linker::sox-2]) X</i>                                                                                                     | <b>IS3458</b> |
| <i>dsh-1(ok1445) II; gals245[col-34p::his-24::mcherry; unc-119(+)] V; oxIs12[unc-47p::gfp; lin-15(+)] X</i>                                                                                                     | <b>IS3464</b> |
| <i>egl-27(ok1670) II; wyIs75[unc-47p::dsred; exp-1p::gfp; odr-1p::rfp] III; him-5(e1490)V</i>                                                                                                                   | <b>IS3469</b> |
| <i>egl-5(n945) III; syIs50[cdh-3p::gfp; dpy-20(+)]</i>                                                                                                                                                          | <b>IS3475</b> |
| <i>egl-20(n585) IV ; gals245[col-34p::his-24::mcherry; unc-119(+)] V; oxIs12[unc-47p::gfp; lin-15(+)] X</i>                                                                                                     | <b>IS3485</b> |
| <i>lin-44(n1792)I; gals245[col-34p::his-24::mcherry; unc-119(+)] V; oxIs12[unc-47p::gfp; lin-15(+)] X</i>                                                                                                       | <b>IS3486</b> |
| <i>lin-44(n1792) I ; egl-20(n585) IV ; gals245[col-34p::his-24::mCherry; unc-119(+)] V ; oxIs12[unc-47p::gfp; lin-15(+)] X</i>                                                                                  | <b>IS3487</b> |
| <i>gals245[col-34p::his-24::mcherry; unc-119(+)] V; lim-6(nr2073) oxIs12[unc-47p::gfp; lin-15(+)] X</i>                                                                                                         | <b>IS3490</b> |
| <i>par-1(zu310) gals245[col-34p::his-24::mcherry; unc-119(+)] V; oxIs12[unc-47p::gfp; lin-15(+)] X</i>                                                                                                          | <b>IS3491</b> |
| <i>fmi-1(rh308) gals245[col-34p::his-24::mcherry; unc-119(+)] V; oxIs12[unc-47p::gfp; lin-15(+)] X</i>                                                                                                          | <b>IS3511</b> |
| <i>dsh-1(ok1445) mig-5(tm2639) II; oxIs12[unc-47p::gfp; lin-15(+)] X</i>                                                                                                                                        | <b>IS3512</b> |
| <i>wyIs75[unc-47p::dsred; exp-1p::gfp; odr-1p::rfp] III; gals245[col-34p::his-24::mcherry; unc-119(+)] V; sox-2(syb737[gfp::linker::sox-2]) X; fpEx1156[egl-5p(6.5kb)::nanobodyGFP::zif-1; coel::gfp; pBSK]</i> | <b>IS3521</b> |

|                                                                                                                                                                 |               |
|-----------------------------------------------------------------------------------------------------------------------------------------------------------------|---------------|
| <i>gpr-1(ok2126) III; gaIs245[col-34p::his-24::mcherry; unc-119(+)] V; oxIs12[unc-47p::gfp; lin-15(+)] X</i>                                                    | <b>IS3530</b> |
| <i>sem-4(n1971)I; edIs6[unc-119p::gfp; rol-6(su1006)] IV; gaIs245[col-34p::his-24::mcherry; unc-119(+)] V</i>                                                   | <b>IS3537</b> |
| <i>sem-4(n1971)I; gaIs245[col-34p::his-24::mcherry; unc-119(+)] V; otIs118[unc-33p::gfp; unc-4(+)]</i>                                                          | <b>IS3539</b> |
| <i>gaIs245[col-34p::his-24::mcherry; unc-119(+)] V; ceh-6(syb972)[gfp::linker::ceh-6)] X</i>                                                                    | <b>IS3540</b> |
| <i>lin-17(n671) bxIs7[egl-5(6.5kb)::gfp; lin-15(+)] I; otIs173[rgef-1p::dsred2; ttx-3pB::gfp]III</i>                                                            | <b>IS3583</b> |
| <i>hT2[bli-4(e937) let-?(q782) qIs48] (I;III)/pop-1(q645)I ; gaIs245[col-34p::his-24::mcherry; unc-119(+)] V; oxIs12[unc-47p::gfp; lin-15(+)] X</i>             | <b>IS3596</b> |
| <i>hT2[bli-4(e937) let-?(q782) qIs48] (I;III)/pop-1(q645)I; gaIs245[col-34p::his-24::mcherry; unc-119(+)] V; fpEx1111[lim-6int4::gfp; coel::dsred]</i>          | <b>IS3600</b> |
| <i>otIs173[rgef-1p::dsred2; ttx-3pB::gfp]III; oxIs12[unc-47p::gfp; lin-15(+)] X</i>                                                                             | <b>IS3604</b> |
| <i>lin-5(ev571)II; gaIs245[col-34p::his-24::mcherry; unc-119(+)] V; fpIs101[col-34p::ph::gfp; odr-1p::dsRed] X</i>                                              | <b>IS3619</b> |
| <i>sem-4(n1971)I; gaIs245[col-34p::his-24::mcherry; unc-119(+)] V; lim-6(syb971)[lim-6::linker::gfp]X</i>                                                       | <b>IS3632</b> |
| <i>lin-17(n671)I; gaIs245[col-34p::his-24::mcherry; unc-119(+)] V; lim-6(syb971)[lim-6::linker::gfp]X</i>                                                       | <b>IS3669</b> |
| <i>gaIs245[col-34p::his-24::mcherry; unc-119(+)] V; lim-6(syb971)[lim-6::linker::gfp]X</i>                                                                      | <b>IS3677</b> |
| <i>lin-17(n671) I; gaIs245[col-34p::his-24::mcherry; unc-119(+)] V; ceh-6(syb972)[gfp::linker::ceh-6)] X</i>                                                    | <b>IS3702</b> |
| <i>sys-1(q544) I; gaIs245[col-34p::his-24::mcherry; unc-119(+)] V; oxIs12[unc-47p::gfp; lin-15(+)] X</i>                                                        | <b>IS3718</b> |
| <i>krIs6[unc-47::DsRed2; lin-15(+)] II ; gaIs245[col-34p::HIS-24::mCherry; unc-119(+)] V; fpEx1295(pcr fragment col-34p::gfp::cki-1(gDNA), myo-2p::mCherry]</i> | <b>IS3950</b> |
| <i>krIs6[unc-47::DsRed2; lin-15(+)] II ; gaIs245[col-34p::HIS-24::mCherry; unc-119(+)] V; fpEx1296(pcr fragment col-34p::gfp::cki-1(gDNA), myo-2p::mCherry]</i> | <b>IS3951</b> |
| <i>krIs6[unc-47::DsRed2; lin-15(+)] II ; gaIs245[col-34p::HIS-24::mCherry; unc-119(+)] V; fpEx1297(pcr fragment col-34p::gfp::cki-1(cDNA), myo-2p::mCherry]</i> | <b>IS3952</b> |
| <i>krIs6[unc-47::DsRed2; lin-15(+)] II ; gaIs245[col-34p::HIS-24::mCherry; unc-119(+)] V; fpEx1298(pcr fragment col-34p::gfp::cki-1(gDNA), myo-2p::mCherry]</i> | <b>IS3972</b> |
| <i>krIs6[unc-47::DsRed2; lin-15(+)] II ; gaIs245[col-34p::HIS-24::mCherry; unc-119(+)] V; fpEx1299(pcr fragment col-34p::gfp::cki-1(gDNA), myo-2p::mCherry]</i> | <b>IS3973</b> |
| <i>krIs6[unc-47::DsRed2; lin-15(+)] II ; gaIs245[col-34p::HIS-24::mCherry; unc-119(+)] V; fpEx1300(pcr fragment col-34p::gfp::cki-1(gDNA), myo-2p::mCherry]</i> | <b>IS3974</b> |

**Table S3. Oligonucleotides list.**

| Oligo name                               | Sequence                                                                                                                       | Use                                                                |
|------------------------------------------|--------------------------------------------------------------------------------------------------------------------------------|--------------------------------------------------------------------|
| BDT950                                   | CTGAATCCGGATCCATCATCATGTCTGACTGCAGAATTCGAAGCTT<br>GTCGACGGAGCTC                                                                | sox-2 antisense construct                                          |
| BDT952                                   | CTTGGAGGGTACCTAGGAGCTCGATATCTAGAAGAGGTAACATG<br>GGATTGGGA                                                                      | sox-2 antisense construct                                          |
| EB110F                                   | AGAAGACCGCCCCCTTTTGA                                                                                                           | Genotyping <i>ceh-6(syb972)</i>                                    |
| EB110R                                   | GGCTGCCTCCATCTCGTTCT                                                                                                           | Genotyping <i>ceh-6(syb972)</i>                                    |
| EB5F                                     | TCCAGTCTCTTCAGGTCAGTGATCT                                                                                                      | Genotyping <i>egl-27(ok1670)</i>                                   |
| EB5R                                     | CGAGATTTCAAATCTTACCCGACTG                                                                                                      | Genotyping <i>egl-27(ok1670)</i>                                   |
| EB6R                                     | GTGTAATTGACAGCGATGATGATGAAGG                                                                                                   | Genotyping <i>egl-27(ok1670)</i>                                   |
| LIN5 FW 01                               | GACAAGACCAAGTTATCGGC                                                                                                           | Genotyping <i>lin-5(ev571)</i> ,<br>digest w/ BglII                |
| LIN5 RV 01                               | CCCATTGACTGAAATCTTCG                                                                                                           | Genotyping <i>lin-5(ev571)</i> ,<br>digest w/ BglII                |
| mcm124F                                  | GAACTACAACACTTTGGTCAACCATTGGGCCCTGCCACGTTTCC<br>CCCAT                                                                          | Genotyping <i>egl-5(n945)</i> ,<br>digest w/ NcoI                  |
| mcm124R                                  | CGTAAGATAGCATATAGGGTCAGACG                                                                                                     | Genotyping <i>egl-5(n945)</i> ,<br>digest w/ NcoI                  |
| mcm125F                                  | CCGCGCCATTGACACCGATTTGGTAC                                                                                                     | Genotyping <i>sem-4(n1971)</i> ,<br>digest w/ Acc65I               |
| mcm125R                                  | CCTAACAAAGCTAGCCTTTTCAGTTACAAAACATCTCTTAACTG<br>GGTA                                                                           | Genotyping <i>sem-4(n1971)</i> ,<br>digest w/ Acc65I               |
| oCG347 rev début GFP                     | CCACTGACAGAAAATTTGTGCC                                                                                                         | Genotyping <i>sem-4</i><br>( <i>syb1287</i> ) and sequencing       |
| oCG368 sens PEST                         | CTTAGCCATGGCTTCCC GCCGGCGGTGGCGGCAGGATGATG<br>GCACGCTGCCCATGTCTTGCCAGGAGAGCGGGATGGACCGT<br>CACCTGCAGCCTGTGCTTCTGCTAGGATCAAT    | PEST sequence fw                                                   |
| oCG369 rev PEST                          | ATTGATCCTAGCAGAAGCACAGGCTGCAGGGTGACGGTCCATCC<br>CGCTCTCCTGGGCACAAGACATGGGCAGCGTGCCATCATCCTGC<br>GCCGCCACCGCCGGGGAAGCCATGGCTAAG | PEST sequence rv                                                   |
| oCG370 sens MW<br>PEST                   | GGATTACACATGGCATGGATGAACTATACAACTTAGCCATGGCT<br>TCCC GCCGGCGGTGGC                                                              | Cloning <i>pest</i> sequence into<br>pML801                        |
| oCG371 rev MW PEST                       | GGTAGCGACCGGCGCTCAGTTGGAATCTACGAATGCTACACATT<br>GATCCTAGCAGAAGCACAGGCTG                                                        | Cloning <i>pest</i> sequence into<br>pML801                        |
| oCG381 lin-26p f                         | CAACTTGAAATGAAATAAGCTTGCATGGATCCGACGTCTTCCCA<br>TTGTCTTCCATTATCTT                                                              | Cloning of the lin-26 rectal<br>specific promoter into<br>pPD97.82 |
| oCG382 lin-26p r                         | GCTGAAAAGTGTCTAGAGTCGACCAAGGCCTGCAGCTGAAAATAA<br>TCAATTAATAATTTAAAAAAGTAAGCGAGGG                                               | Cloning of the lin-26 rectal<br>specific promoter into<br>pPD97.82 |
| oCG390 for NLS1 kpnI                     | AGGGTACCGAGCTCAGAAAAAATGACAGC                                                                                                  | Cloning <i>2nls</i> into pPD95.75                                  |
| oCG391 rev GFP XhoI                      | GGGTATCTCGAGAAGCATTGAACACCATAACAGAAAG                                                                                          | Cloning <i>2nls</i> into pPD95.75                                  |
| oCG411 sens <i>egr-1</i><br><i>ku285</i> | GCCCCAAAAGCCTGAAAAAGCCCCAAAATTTCTCAATTTCCA                                                                                     | Genotyping <i>egr-1(ku285)</i> ,<br>digest w/ Hpy188III            |
| oCG412 rev <i>egr-1</i><br><i>ku285</i>  | GACGTCTCCGAGAAGCTTCGGTGGC                                                                                                      | Genotyping <i>egr-1(ku285)</i> ,<br>digest w/ Hpy188III            |
| oCG444 <i>lim-6</i> 3int sens            | GGATACGCTAACAACTTGAAATGAAATAGGCGCCCTTCTTGAGA<br>TTGCG                                                                          | Cloning <i>lim-6 intron4</i> into<br>pPD95.75                      |
| oCG445 <i>lim-6</i> 3int rev             | CGACCTGCAGGCATGCAAGCTAAAGATTGACATATTGGAGACATC<br>TGCC                                                                          | Cloning <i>lim-6 intron4</i> into<br>pPD95.75                      |
| oCG461 sens <i>sox-2</i><br>CRISPR       | GGTTGTCTTTTGCAGTGTCCGG                                                                                                         | Genotyping <i>sox-2(syb737)</i>                                    |



|                                             |                                                           |                                                             |
|---------------------------------------------|-----------------------------------------------------------|-------------------------------------------------------------|
| <b>oCG462 rev sox-2 CRISPR</b>              | CAGAGCCATTTTCTCCGCTGTC                                    | Genotyping <i>sox-2</i> ( <i>syb737</i> )                   |
| <b>oCG463 sens sem-4 CRISPR</b>             | GACGACGAATCTTCGATGTGGC                                    | Genotyping <i>sem-4</i> ( <i>syb1287</i> )                  |
| <b>oCG464 rev sem-4 CRISPR</b>              | GGGGGAAAGAGGGAAAATTAGCTG                                  | Genotyping <i>sem-4</i> ( <i>syb1287</i> )                  |
| <b>oCG556 sens HMG</b>                      | GACAGCCCAGATCTGGGTACCCAAGGAGGTGAAAAGCGAAGA                | cloning of POP-1 HMG                                        |
| <b>oCG557 rev HMG</b>                       | GACGGAGCTCGAATTCGATCCTTA ACTCTTATCCCTTCGTTTCTT CG         | cloning of POP-1 HMG                                        |
| <b>oCR017 <i>ceh-6</i> fw</b>               | GGCGGATGCAAGATTTTACG                                      | Genotyping <i>ceh-6</i> ( <i>gk665</i> )                    |
| <b>oCR018 <i>ceh-6</i> rv wt</b>            | GGATGACGACGAAGGTATGAG                                     | Genotyping <i>ceh-6</i> ( <i>gk665</i> )                    |
| <b>oCR019 <i>ceh-6</i> rev <i>gk665</i></b> | CTGTGACAATGTTCCCGGAG                                      | Genotyping <i>ceh-6</i> ( <i>gk665</i> )                    |
| <b>oCR029 fw <i>ceh-18</i>(<i>mg57</i>)</b> | CCCACACCAGTTCCACAAATGGC                                   | Genotyping <i>ceh-18</i> ( <i>mg57</i> )                    |
| <b>oCR030 rv <i>ceh-18</i>(<i>mg57</i>)</b> | AGGCTAGAAAAGTTCTACGGG                                     | Genotyping <i>ceh-18</i> ( <i>mg57</i> )                    |
| <b>oCR036 rv <i>ceh-18</i> wt</b>           | GCTCGCCGCTCAATTCTTGAT                                     | Genotyping <i>ceh-18</i> ( <i>mg57</i> )                    |
| <b>oCR061 fw Afel EpiDeg</b>                | GAGGGTACCAGAGCTCAAGCGCTATTACCTGGCACCGACTAC                | Cloning Afel and XhoI sites into pOD1988                    |
| <b>oCR062 rv XhoI EpiDeg</b>                | CCAGACTCCACCAGTTGGACTTGATCCATCTCGAGTTATCTGGAA CAAAATGTAAG | Cloning Afel and XhoI sites into pOD1988                    |
| <b>oCR073 Ascl nanob</b>                    | ATAAAAGGCGCGCCAAAAAATGGATCAAGTCCA ACTGGT                  | Cloning <i>nanobodyGFP::zif-1</i> into pSJ671               |
| <b>oCR074 U54 Apal</b>                      | GTAATAGGGCCCTTAACCCTACTAAAGGGAACAAAA                      | Cloning <i>nanobodyGFP::zif-1</i> into pSJ671               |
| <b>oCR075 <i>tm1422</i> fw</b>              | GGGCCAGAAGATTGCACCAC                                      | Genotyping <i>vang-1</i> ( <i>tm1422</i> )                  |
| <b>oCR076 <i>tm1422</i> rv wt</b>           | GCATGCTGAAGCCGAAACGT                                      | Genotyping <i>vang-1</i> ( <i>tm1422</i> )                  |
| <b>oCR077 <i>tm1422</i> rv</b>              | CGCAATCGGTAGAATTGAAAATTTCCGG                              | Genotyping <i>vang-1</i> ( <i>tm1422</i> )                  |
| <b>oCR087 <i>nr2073</i> fw</b>              | GTAATGCGCGAAGCTTCCTG                                      | Genotyping <i>lim-6</i> ( <i>nr2073</i> )                   |
| <b>oCR088 <i>nr2073</i>rv wt</b>            | GGGAGCCTATAGGTCAGCTCT                                     | Genotyping <i>lim-6</i> ( <i>nr2073</i> )                   |
| <b>oCR089 <i>nr2073</i> rv</b>              | CCTCCGCTTGGAAGGACAAAA                                     | Genotyping <i>lim-6</i> ( <i>nr2073</i> )                   |
| <b>oCR092 <i>rh308</i> fw</b>               | GTGATAATGCTCGTATTGTCTATTCCATTGATTCCTAT                    | Genotyping <i>fmi-1</i> ( <i>rh308</i> ), digest w/ AseI    |
| <b>oCR093 <i>rh308</i> rv</b>               | GTGGATGAGATCCGCCGTCAG                                     | Genotyping <i>fmi-1</i> ( <i>rh308</i> ), digest w/ AseI    |
| <b>oCR094bis</b>                            | CCTCTTAAAAACTTACCTCTCAAATTTGAACTTATTCAAGC                 | Genotyping <i>egl-20</i> ( <i>n585</i> ), digest w/ HindIII |
| <b>oCR095 <i>n585</i> rv</b>                | GAACATTGGCATTGTGGGTTCAAAC                                 | Genotyping <i>egl-20</i> ( <i>n585</i> ), digest w/ HindIII |
| <b>oCR096 <i>n1792</i> fw</b>               | CTTCAAACTGTGCGAATCGTTTGAGATTTAGCCCT                       | Genotyping <i>lin-44</i> ( <i>n1792</i> ), digest w/ AvrII  |
| <b>oCR097 <i>n1792</i> rv</b>               | CCTTTTGACCCTACCCGCCGAAC                                   | Genotyping <i>lin-44</i> ( <i>n1792</i> ), digest w/ AvrII  |
| <b>oCR105 <i>zu310</i> fw</b>               | CCCACATTCATCCATCGATCTTTCATAAT                             | Genotyping <i>par-1</i> ( <i>zu310</i> ), digest w/ SspI    |
| <b>oCR106 <i>zu310</i> rv</b>               | GTCTCTGCTGTTCAATATTTGCATTTCG                              | Genotyping <i>par-1</i> ( <i>zu310</i> ), digest w/ SspI    |
| <b>oCR107 <i>ok2126</i>fw wt</b>            | CTGAACTGCCTGCTGCCAGA                                      | Genotyping <i>gpr-1</i> ( <i>ok2126</i> )                   |
| <b>oCR108 <i>ok2126</i>rv</b>               | CACGAAAGTCATCAACGTATGTAGTAAAG                             | Genotyping <i>gpr-1</i> ( <i>ok2126</i> )                   |
| <b>oCR109 <i>ok2126</i>fw mu</b>            | CCAAGGCTCGACGGTTTGC                                       | Genotyping <i>gpr-1</i> ( <i>ok2126</i> )                   |
| <b>oCR113 <i>ga80</i> fw</b>                | GCATAGTGAGTTCTGGAATTGCTCGAACTGTGTATACTGCCC                | Genotyping <i>bar-1</i> ( <i>ga80</i> ), digest w/ BclI     |
| <b>oCR114 <i>ga80</i> rv</b>                | CATCCATGGCCGACTATGAGCCGATCCCCACTCTTCTGAT                  | Genotyping <i>bar-1</i> ( <i>ga80</i> ), digest w/ BclI     |



|                           |                                                                 |                                                                                                      |
|---------------------------|-----------------------------------------------------------------|------------------------------------------------------------------------------------------------------|
| <b>oCR122 q645 fw</b>     | CGATGGATTTTCGACCGGCACC                                          | Genotyping <i>pop-1(q645)</i> ,<br>digest w/ ClaI                                                    |
| <b>oCR123 q645 rv</b>     | GATATAAAAATACACAAAAATGATGGCCGACGAAGAGCTCATCGA                   | Genotyping <i>pop-1(q645)</i> ,<br>digest w/ ClaI                                                    |
| <b>oCR128 n1378 fw</b>    | CAACACCGAATCCAAAAACGAAAATCCACTGCTTGCCATG                        | Genotyping <i>sem-4(n1378)</i> ,<br>digest w/ SphI                                                   |
| <b>oCR129 n1378 rv</b>    | CCACGAGTTGTGAATGCGCGTCCAC                                       | Genotyping <i>sem-4(n1378)</i> ,<br>digest w/ SphI                                                   |
| <b>oCR138 syb971fw</b>    | GACATTCGAAGCTCTGATGATG                                          | Genotyping <i>lim-6(syb971)</i>                                                                      |
| <b>oCR139 syb971rv wt</b> | GTGCAAAGATTAGAGCTCTGAC                                          | Genotyping <i>lim-6(syb971)</i>                                                                      |
| <b>oCR140 syb971rv mu</b> | GGGTATCTCGAGAAGCATTG                                            | Genotyping <i>lim-6(syb971)</i>                                                                      |
| <b>oCR144 n1051 fw</b>    | CACTACAGAGTTATGGCAAACATCGACTACCTCTCGTTCCCAT                     | Genotyping <i>lin-18(n1051)</i> ,<br>digest w/ NcoI                                                  |
| <b>oCR145 n1051 rv</b>    | CCTGTGCAATTTCACTTTCAACGGCTC                                     | Genotyping <i>lin-18(n1051)</i> ,<br>digest w/ NcoI                                                  |
| <b>oCR149 gm122 fw</b>    | GACCACGATTTACTTCGGCAACG                                         | Genotyping <i>cam-1(gm122)</i> ,<br>digest w/ BclI                                                   |
| <b>oCR150 gm122 rv</b>    | CATCATATGTATAAAGTTTGCGAATCGGATTCTAATGAT                         | Genotyping <i>cam-1(gm122)</i> ,<br>digest w/ BclI                                                   |
| <b>oCR151 q544 fw</b>     | CCTGTTGGCGGAGGAGTTGATCATGTGG                                    | Genotyping <i>sys-1(q544)</i> ,digest<br>w/ AflIII                                                   |
| <b>oCR152 q544 rv</b>     | GGCAAAAAGATCCTCACATGAAACACTGCGCAAATCACGT                        | Genotyping <i>sys-1(q544)</i> ,digest<br>w/ AflIII                                                   |
| <b>oCR153 n671</b>        | CCGCATTTTTCGTAGATCACACC                                         | Sequencing <i>lin-17(n671)</i>                                                                       |
| <b>oCR154 n671</b>        | CGAGCACATTCCACAGAAGATG                                          | Sequencing <i>lin-17(n671)</i>                                                                       |
| <b>oCR155 lin-17p fw</b>  | CTGAAGCTTACACTTTGTTTCGCTC                                       | Cloning <i>lin-17p</i> reporter                                                                      |
| <b>oCR156 lin-17p rv</b>  | CGGCTGCAGTTTGAGAAGGAGCCAGTCTCTC                                 | Cloning <i>lin-17p</i> reporter                                                                      |
| <b>oCR157 wrm-1 fw</b>    | GATGTTCTTCCGACTGAATGC                                           | Sequencing and genotyping<br><i>wrm-1(ne1982ts)</i>                                                  |
| <b>oCR158 wrm-1 rv</b>    | CTTGTGCTCCACCCATTTG                                             | Sequencing and genotyping<br><i>wrm-1(ne1982ts)</i>                                                  |
| <b>pLG7F</b>              | ACGCGTCGACGTGAAAACATAGTGTTCACAGTAC                              | <i>sox-2</i> antisens construct                                                                      |
| <b>pLG7R</b>              | GCTCTAGAGATATTATACATATTTCCATAAAGCCAAC                           | <i>sox-2</i> antisens construct                                                                      |
| <b>oSKS-233</b>           | ATGAACTATACAAAGCTTTCGAATTCTGCAGTCGACA<br>TGTCTTCTGCTCGTCGTTGC   | To amplify <i>cki-1</i> for<br>construction of pSJ1108                                               |
| <b>oSKS-234</b>           | ATTCATGCATAGGCCTGCGGCCGCGCTAGCCTAGTAT<br>GGAGAGCATGAAGATCGAGTTC | To amplify <i>cki-1</i> for<br>construction of pSJ1108                                               |
| <b>oSKS-235</b>           | ATGGACTACAAGGACGACGATGACAAGTAAGGATCC<br>GAATTCGAGCTCC           | To insert Flag at the C-<br>terminal of <i>hmg-pop1</i> in<br>pSJ769, for construction of<br>pSJ1107 |
| <b>oSKS-236</b>           | ACTCTTATCCCTTCGTTTCTTCGTC                                       | To insert Flag at the C-<br>terminal of <i>hmg-pop1</i> in<br>pSJ769, for construction of<br>pSJ1107 |
| <b>oSKS-237</b>           | AACCAAAGTTCTCACTGTCAGAACCA                                      | To delete intron from <i>cki-1</i><br>for construction of<br>pSJ1112                                 |
| <b>oSKS-238</b>           | CTGTAGAACTCCGGAACACAATTCTCT                                     | To delete intron from <i>cki-1</i><br>for construction of<br>pSJ1112                                 |
| <b>psj6094sox-2 F</b>     | TCGACATGATGATGGATCCGGATTACAGC                                   | 6XHis:: <i>sox-2</i> construct                                                                       |
| <b>psj6094sox-2 R</b>     | GTGCGGCCGCAAGCTTGGTACC                                          | 6XHis:: <i>sox-2</i> construct                                                                       |
